# Supplementary material
Source: Springer Nature journal article supplement (https://www.springermedizin.de/resource/supplementary/13256_2009_1336_MOESM1_ESM.pdf/9647524)

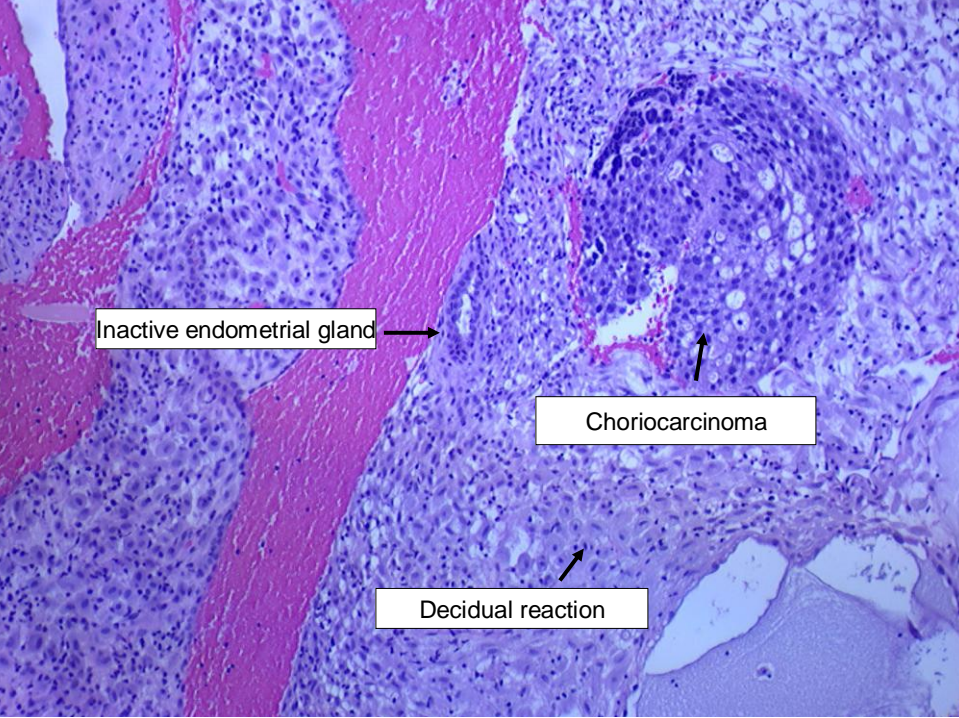

Inactive endometrial gland

Choriocarcinoma

Decidua reaction

Supplement: MOESM1 [file 9647524]
